# Supplementary material
Source: Springer Nature journal article supplement (https://www.springermedizin.de/resource/supplementary/12874_2008_365_MOESM1_ESM.pdf/9434318)
Supplement: MOESM1 [file 9434318]

| MLM Unconditional Model                                      |                                             | Mplus (5.1)       | MLwiN (2.02) | GLLAMM (Stata 9.2)   | Mplus (5.1)            | MLwiN (2.02) | GLLAMM (Stata 9.2) | Mplus (5.1)            | MLwiN (2.02) | GLLAMM (Stata 9.2) |
|--------------------------------------------------------------|---------------------------------------------|-------------------|--------------|----------------------|------------------------|--------------|--------------------|------------------------|--------------|--------------------|
| <b>Fixed Effects</b>                                         |                                             | <b>Unweighted</b> |              |                      | <b>Weight Method A</b> |              |                    | <b>Weight Method B</b> |              |                    |
| $\beta_0$                                                    | (Intercept for MS_UNINS)                    | 0.453             | 0.453        | 0.455                | 0.457                  | 0.457        | 0.456              | 0.457                  | 0.457        | 0.457              |
| SE                                                           |                                             | 0.030             | 0.030        | 0.024                | 0.029                  | 0.029        | 0.026              | 0.029                  | 0.029        | 0.029              |
| <b>Random Effects</b>                                        |                                             |                   |              |                      |                        |              |                    |                        |              |                    |
| $\sigma^2_\epsilon$                                          | Residual Variance (Variation within States) | 3.752             | 3.752        | 3.752                | 3.703                  | 3.704        | 3.703              | 3.742                  | 2.710        | 3.742              |
| SE                                                           |                                             | 0.263             | 0.263        | 0.266                | 0.254                  | 0.254        | 0.257              | 0.262                  | 0.200        | 0.265              |
| $\sigma^2_0$                                                 | Variance in the Intercepts Between States   | 0.040             | 0.040        | 0.040                | 0.038                  | 0.038        | 0.039              | 0.037                  | 0.038        | 0.037              |
| SE                                                           |                                             | 0.012             | 0.012        | 0.010                | 0.010                  | 0.010        | 0.011              | 0.010                  | 0.010        | 0.010              |
| <b>MLM Level-1 Predictor Only (Fixed Effect)</b>             |                                             | Mplus (5.1)       | MLwiN (2.02) | GLLAMM (Stata 9.2)   | Mplus (5.1)            | MLwiN (2.02) | GLLAMM (Stata 9.2) | Mplus (5.1)            | MLwiN (2.02) | GLLAMM (Stata 9.2) |
| <b>Fixed Effects</b>                                         |                                             | <b>Unweighted</b> |              |                      | <b>Weight Method A</b> |              |                    | <b>Weight Method B</b> |              |                    |
| $\beta_0$                                                    | (Intercept for MS_UNINS)                    | 0.453             | 0.453        | 0.455                | 0.430                  | 0.430        | 0.430              | 0.430                  | 0.430        | 0.430              |
| SE                                                           |                                             | 0.030             | 0.030        | 0.024                | 0.028                  | 0.028        | 0.028              | 0.028                  | 0.028        | 0.028              |
| $\beta_1$                                                    | (Slope for Family Income)                   | -0.088            | -0.088       | -0.088               | -0.078                 | -0.078       | -0.078             | -0.078                 | -0.078       | -0.078             |
| SE                                                           |                                             | 0.009             | 0.009        | 0.009                | 0.008                  | 0.008        | 0.008              | 0.008                  | 0.008        | 0.008              |
| <b>Random Effects</b>                                        |                                             |                   |              |                      |                        |              |                    |                        |              |                    |
| $\sigma^2_\epsilon$                                          | Residual Variance (Variation within States) | 3.698             | 3.698        | 3.698                | 3.657                  | 3.658        | 3.696              | 3.696                  | 2.676        | 3.696              |
| SE                                                           |                                             | 0.256             | 0.256        | 0.258                | 0.248                  | 0.248        | 0.258              | 0.256                  | 0.196        | 0.258              |
| $\sigma^2_0$                                                 | Variance in the Intercepts Between States   | 0.041             | 0.041        | 0.040                | 0.040                  | 0.040        | 0.039              | 0.039                  | 0.040        | 0.039              |
| SE                                                           |                                             | 0.012             | 0.012        | 0.010                | 0.010                  | 0.010        | 0.010              | 0.010                  | 0.010        | 0.010              |
| <b>MLM Level-1 Predictor Only (Fixed and Random Effects)</b> |                                             | Mplus (5.1)       | MLwiN (2.02) | GLLAMM (Stata 9.2)** | Mplus (5.1)            | MLwiN (2.02) | GLLAMM (Stata 9.2) | Mplus (5.1)            | MLwiN (2.02) | GLLAMM (Stata 9.2) |
| <b>Fixed Effects</b>                                         |                                             | <b>Unweighted</b> |              |                      | <b>Weight Method A</b> |              |                    | <b>Weight Method B</b> |              |                    |
| $\beta_0$                                                    | (Intercept for MS_UNINS)                    | 0.453             | 0.453        | 0.455                | 0.432                  | 0.432        | 0.433              | 0.433                  | 0.433        | 0.433              |
| SE                                                           |                                             | 0.030             | 0.030        | 0.035                | 0.028                  | 0.028        | 0.026              | 0.028                  | 0.028        | 0.027              |
| $\beta_1$                                                    | (Slope for Family Income)                   | -0.089            | -0.089       | -0.089               | -0.080                 | -0.080       | -0.080             | -0.080                 | -0.080       | -0.080             |
| SE                                                           |                                             | 0.009             | 0.009        | 0.010                | 0.009                  | 0.008        | 0.008              | 0.009                  | 0.009        | 0.008              |
| <b>Random Effects</b>                                        |                                             |                   |              |                      |                        |              |                    |                        |              |                    |
| $\sigma^2_\epsilon$                                          | Residual Variance (Variation within States) | 3.676             | 3.676        | 3.676                | 3.635                  | 3.636        | 3.635              | 3.675                  | 2.660        | 3.675              |
| SE                                                           |                                             | 0.252             | 0.252        | 0.254                | 0.245                  | 0.245        | 0.248              | 0.253                  | 0.194        | 0.255              |
| $\sigma^2_0$                                                 | Variance in the Intercepts Between States   | 0.041             | 0.041        | 0.041                | 0.035                  | 0.035        | 0.035              | 0.033                  | 0.035        | 0.033              |
| SE                                                           |                                             | 0.012             | 0.012        | 0.015                | 0.009                  | 0.009        | 0.007              | 0.009                  | 0.009        | 0.008              |
| $\sigma^2_1$                                                 | Variance in the Slopes Between States       | 0.003             | 0.003        | 0.003                | 0.003                  | 0.003        | 0.003              | 0.003                  | 0.003        | 0.003              |
| SE                                                           |                                             | 0.001             | 0.001        | 0.001                | 0.001                  | 0.001        | 0.001              | 0.001                  | 0.001        | 0.001              |
| $\sigma_{01}$                                                | Covariance                                  | -0.010            | -0.010       | -0.010               | -0.008                 | -0.008       | -0.008             | -0.008                 | -0.008       | -0.008             |
| SE                                                           |                                             | 0.004             | 0.004        | 0.004                | 0.002                  | 0.002        | 0.002              | 0.002                  | 0.002        | 0.002              |
| <b>MLM Level-2 Predictor Only</b>                            |                                             | Mplus (5.1)       | MLwiN (2.02) | GLLAMM (Stata 9.2)   | Mplus (5.1)            | MLwiN (2.02) | GLLAMM (Stata 9.2) | Mplus (5.1)            | MLwiN (2.02) | GLLAMM (Stata 9.2) |
| <b>Fixed Effects</b>                                         |                                             | <b>Unweighted</b> |              |                      | <b>Weight Method A</b> |              |                    | <b>Weight Method B</b> |              |                    |
| $\beta_0$                                                    | (Intercept for MS_UNINS)                    | 0.453             | 0.453        | 0.460                | 0.456                  | 0.456        | 0.456              | 0.457                  | 0.457        | 0.457              |
| SE                                                           |                                             | 0.027             | 0.028        | 0.028                | 0.027                  | 0.027        | 0.028              | 0.027                  | 0.028        | 0.028              |
| $\beta_1$                                                    | (Slope for State Poverty)                   | 1.449             | 1.484        | 1.449                | 1.213                  | 1.243        | 1.213              | 1.224                  | 1.251        | 1.224              |
| SE                                                           |                                             | 0.389             | 0.368        | 0.393                | 0.413                  | 0.395        | 0.418              | 0.415                  | 0.395        | 0.457              |
| <b>Random Effects</b>                                        |                                             |                   |              |                      |                        |              |                    |                        |              |                    |
| $\sigma^2_\epsilon$                                          | Residual Variance (Variation within States) | 3.752             | 3.752        | 3.752                | 3.703                  | 3.704        | 3.703              | 3.742                  | 2.710        | 3.742              |
| SE                                                           |                                             | 0.263             | 0.263        | 0.266                | 0.254                  | 0.254        | 0.257              | 0.262                  | 0.200        | 0.265              |
| $\sigma^2_0(\tau_{00})$                                      | Variance in the Intercepts Between States   | 0.034             | 0.034        | 0.034                | 0.034                  | 0.034        | 0.034              | 0.032                  | 0.034        | 0.032              |
| SE                                                           |                                             | 0.012             | 0.012        | 0.012                | 0.010                  | 0.010        | 0.010              | 0.010                  | 0.010        | 0.010              |
| <b>MLM Level-1 and Level-2 Predictors</b>                    |                                             | Mplus (5.1)       | MLwiN (2.02) | GLLAMM (Stata 9.2)** | Mplus (5.1)            | MLwiN (2.02) | GLLAMM (Stata 9.2) | Mplus (5.1)            | MLwiN (2.02) | GLLAMM (Stata 9.2) |
| <b>Fixed Effects</b>                                         |                                             | <b>Unweighted</b> |              |                      | <b>Weight Method A</b> |              |                    | <b>Weight Method B</b> |              |                    |
| $\beta_0$                                                    | (Intercept for MS_UNINS)                    | 0.453             | 0.453        | 0.454                | 0.432                  | 0.432        | 0.433              | 0.434                  | 0.433        | 0.434              |
| SE                                                           |                                             | 0.028             | 0.028        | 0.026                | 0.026                  | 0.026        | 0.025              | 0.026                  | 0.026        | 0.026              |
| $\beta_2$                                                    | (Slope for State Poverty)                   | 1.540             | 1.583        | 1.567                | 1.408                  | 1.436        | 1.409              | 1.425                  | 1.453        | 1.425              |
| SE                                                           |                                             | 0.280             | 0.284        | 0.296                | 0.313                  | 0.304        | 0.315              | 0.322                  | 0.304        | 0.325              |
| $\beta_1$                                                    | (Slope for Family Income)                   | -0.090            | -0.090       | -0.090               | -0.080                 | -0.080       | -0.080             | -0.080                 | -0.080       | -0.080             |
| SE                                                           |                                             | 0.009             | 0.009        | 0.008                | 0.009                  | 0.009        | 0.008              | 0.009                  | 0.009        | 0.008              |
| <b>Random Effects</b>                                        |                                             |                   |              |                      |                        |              |                    |                        |              |                    |
| $\sigma^2_\epsilon$                                          | Residual Variance (Variation within States) | 3.676             | 3.676        | 3.676                | 3.635                  | 3.636        | 3.635              | 3.675                  | 2.660        | 3.675              |
| SE                                                           |                                             | 0.252             | 0.252        | 0.026                | 0.245                  | 0.245        | 0.248              | 0.253                  | 0.194        | 0.255              |
| $\sigma^2_0$                                                 | Variance in the Intercepts Between States   | 0.034             | 0.034        | 0.040                | 0.031                  | 0.031        | 0.031              | 0.029                  | 0.031        | 0.029              |
| SE                                                           |                                             | 0.012             | 0.012        | 0.017                | 0.009                  | 0.009        | 0.007              | 0.008                  | 0.009        | 0.008              |
| $\sigma^2_1$                                                 | Variance in the Slopes Between States       | 0.003             | 0.003        | 0.004                | 0.003                  | 0.003        | 0.003              | 0.003                  | 0.003        | 0.003              |
| SE                                                           |                                             | 0.001             | 0.001        | 0.001                | 0.001                  | 0.001        | 0.001              | 0.001                  | 0.001        | 0.001              |
| $\sigma_{01}$                                                | Covariance                                  | -0.010            | -0.010       | -0.011               | -0.008                 | -0.008       | -0.008             | -0.008                 | -0.008       | -0.008             |
| SE                                                           |                                             | 0.004             | 0.004        | 0.004                | 0.003                  | 0.003        | 0.002              | 0.003                  | 0.003        | 0.002              |
| <b>MLM Level-1, Level 2, and Cross-Level Interaction</b>     |                                             | Mplus (5.1)       | MLwiN (2.02) | GLLAMM (Stata 9.2)   | Mplus (5.1)            | MLwiN (2.02) | GLLAMM (Stata 9.2) | Mplus (5.1)            | MLwiN (2.02) | GLLAMM (Stata 9.2) |
| <b>Fixed Effects</b>                                         |                                             | <b>Unweighted</b> |              |                      | <b>Weight Method A</b> |              |                    | <b>Weight Method B</b> |              |                    |
| $\beta_0$                                                    | (Intercept for MS_UNINS)                    | 0.453             | 0.453        | 0.453                | 0.433                  | 0.432        | 0.433              | 0.434                  | 0.433        | 0.434              |
| SE                                                           |                                             | 0.028             | 0.028        | 0.028                | 0.026                  | 0.026        | 0.024              | 0.026                  | 0.026        | 0.025              |
| $\beta_2$                                                    | (Slope for State Poverty)                   | 1.446             | 1.478        | 1.478                | 1.162                  | 1.204        | 1.165              | 1.180                  | 1.217        | 1.181              |
| SE                                                           |                                             | 0.390             | 0.369        | 0.369                | 0.407                  | 0.389        | 0.404              | 0.410                  | 0.389        | 0.411              |
| $\beta_1$                                                    | (Slope for Family Income)                   | -0.090            | -0.090       | -0.090               | -0.080                 | -0.080       | -0.080             | -0.080                 | -0.080       | -0.080             |
| SE                                                           |                                             | 0.009             | 0.009        | 0.009                | 0.009                  | 0.008        | 0.008              | 0.009                  | 0.009        | 0.008              |
| $\beta_3$                                                    | (Slope for Interaction)                     | 0.038             | 0.042        | 0.042                | 0.113                  | 0.108        | 0.112              | 0.115                  | 0.111        | 0.114              |
| SE                                                           |                                             | 0.108             | 0.115        | 0.115                | 0.110                  | 0.131        | 0.110              | 0.111                  | 0.131        | 0.111              |
| $\sigma^2_\epsilon$                                          | Residual Variance (Variation within States) | 3.676             | 3.676        | 3.676                | 3.635                  | 3.636        | 3.635              | 3.675                  | 2.660        | 3.675              |
| SE                                                           |                                             | 0.252             | 0.252        | 0.252                | 0.245                  | 0.245        | 0.248              | 0.253                  | 0.194        | 0.255              |
| <b>Random Effects</b>                                        |                                             |                   |              |                      |                        |              |                    |                        |              |                    |
| $\sigma^2_0$                                                 | Variance in the Intercepts Between States   | 0.034             | 0.034        | 0.034                | 0.030                  | 0.031        | 0.031              | 0.029                  | 0.031        | 0.029              |
| SE                                                           |                                             | 0.012             | 0.012        | 0.012                | 0.009                  | 0.008        | 0.007              | 0.008                  | 0.008        | 0.008              |
| $\sigma^2_1$                                                 | Variance in the Slopes Between States       | 0.003             | 0.003        | 0.003                | 0.003                  | 0.003        | 0.003              | 0.003                  | 0.003        | 0.003              |
| SE                                                           |                                             | 0.001             | 0.001        | 0.001                | 0.001                  | 0.001        | 0.001              | 0.001                  | 0.001        | 0.001              |
| $\sigma_{01}$                                                | Covariance                                  | -0.010            | -0.010       | -0.010               | -0.008                 | -0.008       | -0.008             | -0.008                 | -0.008       | -0.008             |
| SE                                                           |                                             | 0.004             | 0.004        | 0.004                | 0.003                  | 0.003        | 0.002              | 0.003                  | 0.003        | 0.002              |
